# Supplementary material for: Association Mapping and Haplotype Analysis of a 3.1-Mb Genomic Region Involved in Fusarium Head Blight Resistance on Wheat Chromosome 3BS
Source: PLoS One. 2012 Oct 5;7(10):e46444. doi: 10.1371/journal.pone.0046444 (PMC3465345; doi:10.1371/journal.pone.0046444)
Supplement: Table S5 — Passport data of 266 wheat accessions with detailed pedigree information and four controls included in the study. (XLS) [file pone.0046444.s008.xls]

## Sheet: Table S5
Table S5 Passport data of 266 wheat accessions with detailed pedigree information and four controls included in the study.
athe unit is from supplementary file of Hao et al. 2010. bthe code number is related to the INRA Genetic Resource Centre of Clermont-Ferrand.
Code	Unita	code numberb	Origin	Variety name	Pedigree
2	2	1615	AUT	BRILLANT	WIESELBURGER KOLBEN/SAN PASTORE
3	3	4290	AUT	LENTIA	STAMM 65-52(MULTIWEISS)/PROGRESS
4	4	4981	AUT	MULTIBRAUN	HAV34/HEINES VII
5	5	5447	AUT	OENUS	DIPLOMAT/MULTIWEISS
6	6	5857	AUT	PRIMUS	TADORNA/MULTIWEISS
7	7	5867	AUT	PROBSTDORFER MARTIN	HP 35719/PROBSTDORFER EXTREM
12	12	3731	BEL	HYBRIDE DU CENTENAIRE	(S) TRESOR 18
13	13	3967	BEL	JUFY I	JUBILE/FYLGIA DE PRINTEMPS
16	16	5791	BEL	PONY	SCOUT*5/AGENT//STURDY
19	19	183	BGR	CARODEJKA'S'	SKOROSPELKA 35/RUSALKA//ZLATNA DOLINA
20	20	1685	BGR	BULGARIA 301	N16/NOE//L2010-A-4-1-1
21	21	3552	BGR	HEBROS	FORTUNATO/N307
22	22	6375	BGR	RUSALKA	S13/BAN54
23	23	6585	BGR	SKITIA	SONORA 64/3/TEZANOS PINTOS PRECOZ/NAINARI 60//KAVKAZ/4/ZLATNA DOLINA
24	24	7025	BGR	TRAJANA	OGOSTA/KAPLI/SUPREZA//AURORA
25	25	15912	BGR	PLISKA	PD-5517(5517-A-5-5-1-P-3)/RUSALKA
26	26	16095	BGR	PLISKA	PD-5517(5517-A-5-5-1-P-3)/RUSALKA
27	27	16105	BGR	GUSSENKA	Unknown
28	28	974	CHE	ARDUS	A-55/SALTO//HEINES-VII
35	35	7736	CHE	ZENTA	BEZOSTAIA I/ZENITH
41	41	13686	CZE	Senta	BENNO/SAVA//MIRONOVSKAYA 808/ARTOIS DESPREZ
43	43	13875	CZE	BRUTA	BR693/MARA
44	44	13992	CZE	Pavlina	NORMAN/MIRONOVSKAYA-NIZKOROSLAYA
47	47	3562	DEU	Heines Kolben	(S) BLE SAUMUR DE MARS
55	55	954	ESP	ARAGON 03	(S) LV CATALAN DE MONTE
58	58	1766	ESP	CANALEJA 46	YEOMAN II/KRELOFF//GLUYAS EARLY
60	60	8162	ESP	MONTEJUICK	LV-GERONA
61	61	8228	ESP	MAIORCA	LV-Sicily
62	62	8229	ESP	BIVONA	Unknown
65	65	944	FIN	APU	GARNET/PIKA
71	71	6634	FIN	SOPU 7	MARQUIS/RUSKEA
84	84	4598	GBR	Maris Nimrod	CAPPELLE DESPREZ*4/HYBRIDE 46//2*PROFESSEUR MARCHAL
87	87	7390	GBR	Virtue	MARIS HUNTSMAN/MARIS-DURIN
91	91	2706	GRC	EGES	Unknown
92	92	3214	GRC	G67786	Unknown
93	93	3215	GRC	G67804-6	Unknown
95	95	3219	GRC	G71520	Unknown
96	96	4323	GRC	LITIA	Unknown
97	97	5416	GRC	ODESSA EXP.STA.17723	Unknown
98	98	5417	GRC	ODESSA EXP.STA.17725	Unknown
100	100	3319	HUN	GK Bank	BLE-TOM-POUCE/BANKUTI-1201
101	101	3331	HUN	GK Istvan	KREMENA/AURORA
102	102	3335	HUN	GK ORZSE	SAVA/MARIS HUNTSMAN
103	103	3337	HUN	GK_SAGVARI	AURORA/GT76-150
104	104	3347	HUN	GKF2	FE KO 33/PRODUTTORE//BEZOSTAIA 1
108	108	13677	HUN	MV SUMMA	GK36-83/So1586//MV17
110	110	1121	ITA	AUTONOMIA	FRASSINETO 405/MENTANA
111	111	1745	ITA	CAMPODORO	(S) MARA OU FRECCIA
112	112	2724	ITA	ELIA	ESTEANA/LIBERO
113	113	3125	ITA	Fortunato	LAURO BASSI/DAMIANO
114	114	4255	ITA	Lario	ARGELATO/RED RIVER 68
115	115	4292	ITA	LEONE	SAN PASTORE/FUNO
116	116	4345	ITA	LONTRA	FORTUNATO/FRECCIA
117	117	4541	ITA	MARA	AUTONOMIA/AQUILA
118	118	2242	NLD	Cleo	HEINE VII/MINISTRE
126	126	7290	NLD	VASCO	MILDRESS/ELS//FLEVINA/TADORNA
134	134	4959	NOR	MOYSTAD	MO-043-40/KARN II
135	135	6098	NOR	RENO	ELS/T110-21-41
138	138	4902	POL	MODRA	STARKE//CAPPELLE DESPREZ/ST1751
145	145	2740	PRT	ELVAS-60P24	NO.4021/KENYA FARMER
146	146	2743	PRT	ELVAS 62H12	MED/HOPE/PAWNEE//ORO 11-1/COMANCHE/3/RENACIMIENTO
147	147	2751	PRT	ELVAS 68H16	Unknown
148	148	5575	PRT	PADEIRA	MENTANA/ATLE
151	151	6365	PRT	RUIVO	Landrace
152	152	7931	PRT	ALMONSOR	E-4870/C-306//M-5392666.5/3/BLUEBIRD//CORRECAMINOS/INIA-66
154	154	850	ROM	ALBOTA	DIANA/LOVRIN 23
155	155	989	ROM	ARIESAN	RUBIN/TURDA141-65
156	156	1657	ROM	BUCOVINA	KANRED/FUNO//BEZOSTAIA 1/SKOROSPELKA 3b
157	157	1902	ROM	CERES	MICHURINKA/BEZOSTAIA 1
158	158	3046	ROM	FLAMURA 80	LOVRIN-12//RANNYAYA-12/NADADORES-63
159	159	4363	ROM	LOVRIN 13	HEINE VII/SKOROSPELKA 3B
160	160	4370	ROM	LOVRIN 29	RANNYAYA-12/SALZMUNDER-14-44//LOVRIN-62
161	161	4371	ROM	LOVRIN 32	RANNIAIA 12/NADADORES 63//LOVRIN 12
162	162	4374	ROM	LOVRIN 34	RANNIAIA 12/NADADORES 63//LOVRIN 12
171	171	13450	SWE	CROUSTY	W-28543/MOULIN//BEAUCHAMP
173	173	4244	UKR	LAN	KARLIK 1/ODESSKAIA 51//PRIBOI
174	174	4857	UKR	MIRONOVSKAIA 10	BEZOSTAIA I//MIRONOVSKAIA 264/PSENICNO 711-NY
175	175	5676	UKR	PERESVET	LERMA ROJO 64/2*KAVKAZ
176	176	7799	UKR	ZIRCA	ODESSKAIA 16/SCHOTI LERMA
177	177	13672	UKR	SLOBOZHANKA	DONSKAYA-POLUKARLIKOVAYA/PERESVET
178	178	13675	UKR	DONETSKAYA 46	DONETSKAYA 5/DNEPROVSKAYA 775
179	179	13676	UKR	KLEBODARKA	ERYTHROSPERMUM 127/ODESSKAYA 51
181	181	816	YUG	AGROUNIJA	Unknown
182	182	1194	YUG	Banacanka 1	ELIA/BEZOSTAIA 1
183	183	1218	YUG	BARANJKA	SANJA/TP114-1965A//SANJA
184	184	2607	YUG	Dobro polje	BEZOSTAIA I/SAVA
185	185	2667	YUG	DUGOKLASA	MIRONOVSKAIA 808/MEXIQUE-S-NT-GB//NS14-13
186	186	2669	YUG	Dukat	LEONARDO/ETOILE DE CHOISY//AURORA
187	187	5507	YUG	OROVCANKA	BEZOSTAIA 1/S-38
188	188	5995	YUG	RAVNICA	LUTESCENS 7/NS310
189	189	6732	YUG	STIZANKA	TIMOCANKA/BEZOSTAIA I//AURORA
190	190	27935	Anhui	Su mai 2	Selective from Funo
191	191	27937	Anhui	Ma chang 2	Variant plant from St1472/506 radiation
192	192	27942	Hubei	Jing zhou 1	Mentana/Bendiheimai
193	193	27943	Hubei	Jing zhou 2	Mentana/Bendiheimai
194	194	27944	Hubei	Jing zhou 47	Mentana/Bendiheimai
195	195	27945	Hubei	Jing zhou 66	Funo/Durum wheat Egypt F3//Mentana/Bendiheimai F6
196	196	27993	Hubei	Yi bin 1	NP824/IB01828//Yaanzao
197	197	27995	Hubei	Xiang mai 5	St2422/464/Zhengzhou 17
198	198	27983	Zhejiang	Tong ke 9	Selective from Funo
199	199	5213	Beijing	Nong da 139	Nongda 183/Virgilio//1817/30983
200	200	27800	Beijing	Bei jing 8	Bima 4/Early Prermium
201	201	27801	Beijing	Bei jing 13	Beijing 8//Nongda 183/Ica124D
202	202	27803	Beijing	Nong da 90	Kanhong/187
203	203	27804	Beijing	Nong da 155	Nongda 183/Elia//Nongda 183
204	204	27806	Beijing	Nong da 311	Triumph/1817
205	205	27807	Beijing	Ke yi 23	Panicle branch/Quality//Early Prermium
206	206	27808	Beijing	You mang bai 4	Nongda 45/Beijing 8
207	207	27976	Beijing	Nong da 199	56126m/Nongda 90
208	208	27946	Fujian	Jin mai 2148	Jinjiangchibai/Huadong 5//Orofen/3/Rieto
209	209	27947	Fujian	Jin mai 4058	Orofen//Huadong 5/Abbondanza
210	210	27948	Fujian	Jin mai 71	Timoshen/Orofen//Liangjiangmai
211	211	27949	Fujian	Long xi 35	Beidamu/Wenge
212	212	27950	Fujian	Hong mai 5	Selective from Hongmai 1
213	213	27984	Fujian	Jin mai 5	Jinmai4058/Jinmai 52
214	214	27985	Fujian	Ai he shang	Baiheshang/Taihexiaomai
215	215	27796	guangdong	He po liu jiao mai	Landrace
216	216	27896	Ganzu	Gan mai 8	Wuyimai/Abbondanza
217	217	27897	Ganzu	Gan mai 23	Wuyimai/Abbondanza
218	218	27898	Ganzu	Gan mai 39	Variant plant from Abbondanza
219	219	27899	Ganzu	Gan mai 42	Wuyimai/Abbondanza
220	220	27901	Ganzu	Long chun 7	Ganmai 8/Linnong 2
221	221	27902	Ganzu	Long chun 8	Selective from Ganmai 8
222	222	27903	Ganzu	Tian xuan 15	Jubileina II/Abbondanza
223	223	27904	Ganzu	Tian xuan 16	Jubileina II/Abbondanza
224	224	27915	Ganzu	Zhang chun 9	Minxuan 116/Abbondanza
225	225	24685	Hebei	12040	Beijing 8//H.H./Orofen
226	226	27810	Hebei	Shi jia zhuang 407	Triumph/1817
227	227	27811	Hebei	Shi jia zhuang 54	Bima 4/Early Prermium
228	228	27812	Hebei	Shi jia zhuang 52	Triumph/Shite 14
229	229	27815	Hebei	Xiang yang 2	Shiyuanjiao 6243/Heimangmai
230	230	27818	Hebei	Heng shui 6404	Shijiazhuang 407/Roegneria 1//Shanxi 54
231	231	27977	Hebei	Ji mai 14	6354C/Shijiazhuang 63
232	232	27978	Hebei	Heng mai 1	Jinan 4/Xiannong 39
234	234	27870	Heilongjang	Xin shu guang 9	Dongnong 101/Yuanzhong 3908
235	235	27875	Heilongjang	Song hua jiang 1	Marquis/Iumillo//Marquis/Ranred
236	236	27877	Heilongjang	Ke jing 6	Songhuajiang 3/Hezuo 4
237	238	27880	Heilongjang	Ke hong	Ke59Wen F3-67/Ke59Wen F4-68
238	239	27881	Heilongjang	Ke han 2	Kezhen/Kehong
239	240	27883	Heilongjang	Ke quan	Ke59Wen F3-67/Ke59Wen F4-68
240	241	27884	Heilongjang	Ke mao	Songhuajiang 3/Hezuo 4
241	242	27885	Heilongjang	Ke qun	Ke59Wen F3-67/Ke59Wen F4-68
242	243	27886	Heilongjang	Ke zhuang	Songhuajiang 3/Hezuo 4
243	244	27887	Heilongjang	Ke gang	Unknown
244	245	27888	Heilongjang	Dong nong 101	Songhuajiang 1/Lanshou
245	246	27889	Heilongjang	Gang 107	Kegang/Ken 5030
246	247	27980	Heilongjang	Ke 69-701	Ke64F3-526/Rulofen
247	248	24672	Henan	PI SHAN BA	Landrace
248	249	24674	Henan	WU MANG BAI YOU ZI	Landrace
249	250	27842	Henan	ZHENG ZHOU 3	Fulanni//Xinong 6028+Tainong 153
250	251	24671	Henan	ZHANG FEI HU	Landrace
251	252	24675	Henan	SHUI MAI	Landrace
252	253	27779	Henan	Hong bo yan	Landrace
253	254	27780	Henan	You zi tou	Landrace
254	255	27781	Henan	You zi tou	Landrace
255	256	27782	Henan	You zi tou	Landrace
256	257	7672	Jiangsu	Yang mai 1	Selective from Funo
257	258	24691	Jiangsu	YANG MAI 5	Mentana/Triumph//(St1472/506)
258	260	27791	Jiangsu	Fang tou hong mang	Landrace
259	261	27792	Jiangsu	Zao hong mang	Landrace
260	262	27793	Jiangsu	Guang sui zi	Landrace
261	263	27794	Jiangsu	Hong tou zi	Landrace
262	264	27795	Jiangsu	Duo huang mei	Landrace
263	265	27931	Jiangsu	Mao ying a fu	Selective from Funo
264	266	27789	Jilin	Xiao hua yao	Landrace
265	267	27790	Jilin	Kuai mai	Landrace
266	268	27891	Jilin	Cao yuan 1	Pilot/MM21-13
267	269	4304	Liaoning	Liao chun 5	Liaochun 1/Furlongthane
268	270	4306	Liaoning	Liao chun 6	Furlongthane/Liaochun 1
269	271	4308	Liaoning	Liao chun 8	Selective from Liaochun 6
270	272	27892	Liaoning	Liao chun 1	Mn2761/Huadong 5201
271	273	27893	Liaoning	Liao chun 2	Mn2761/Huadong 5201
272	274	27894	Liaoning	Liao chun 4	Mn2761/Huadong 5201
273	275	1356	Shaanxi	BI MA 4	Mazhamai/Quality
274	276	27857	Shaanxi	Shan nong 9	Bima 5/Xinong 6028
275	277	27859	Shaanxi	Bi ma 1	Mazhamai/Quality
276	278	27861	Shaanxi	Xiao yan 4	Fengchan 1/Xiaoyan 759
277	279	27864	Shaanxi	Bao lin 9	Bima 4/Xiannong 19
278	280	27865	Shaanxi	Yan an 15	Yanan 9/Beijing 5
279	281	28001	Shaanxi	Shan nong 1	Bima 1/Xinong 6028
280	282	28003	Shaanxi	Fu zhuang 30	Variant plant from Jinghui 30
281	283	28016	Shaanxi	Chang wu 702	Beijing 8/Suwqn 11//Ckopocneлka JI-3B
282	284	6847	Shandong	Tai shan 1	54405/Orofen
283	285	27831	Shandong	Ji nan 2	Bima 4/Early Prermium
284	286	27832	Shandong	Ji nan 6	Early Prermium/Nong48187
285	287	27833	Shandong	Ji nan 8	Bima 4/Zaoshu 1
286	288	27834	Shandong	Ji nan 9	Xinshi 3/Early Prermium
287	289	27835	Shandong	Ji nan 10	Shijiazhuang 407//Early Prermium/Bima 4
288	290	27837	Shandong	De xuan 1	Zaoshu 1/Bima 4
289	291	27986	Shandong	Chang wei 20	Variant plant from Maoying Funo
290	292	27988	Shandong	Lu mai 5	Aimengniu/Fu 66
291	293	27769	Shanxi	Tu tou hong sui si yue huang	Landrace
292	294	27770	Shanxi	Bai shan ge da	Landrace
293	295	27771	Shanxi	He nan mai	Landrace
294	296	27772	Shanxi	Hong gan mai	Landrace
295	297	27773	Shanxi	Bi quan mai	Landrace
296	298	27774	Shanxi	Hong shui mai	Landrace
297	299	27775	Shanxi	Yang zhong hong shan mai	Landrace
298	300	27817	Shanxi	Han xuan 2	Nongda 15/Huabei 187
299	301	27829	Shanxi	1817	Selective from Pinyaoxiaobaimai
300	302	27830	Shanxi	Ming xian 169	Selective from landrace
301	303	27969	Guizhou	Da mai zi	Landrace
302	304	7703	Sichuan	You yi mai	Landrace
303	305	27951	Sichuan	Chuan mai 8	Mara/Sichuanwuyimai
304	306	27952	Sichuan	Ya an zao	Hechuanhongpaideng/Ardito F6//Shannong 205
305	307	27953	Sichuan	Fan 6	IB01828/NP824/3/Wuyimai//Chenduguangtoufenzhimai/Zhongnong483fenzhimai/4/Zhongnong28Bfenzhimai/IB01828//NP824kuangkefu
306	308	27957	Sichuan	Xi chang fan xiu mai	Abbondanza/59-3
307	309	27958	Sichuan	Xi chang 662	Abbondanza/59-3
308	310	27964	Yunnan	Yun mai 27	Funo/Kangxiu 1
309	311	27997	Yunnan	Yun mai 35	Funo/India 798
310	312	27916	Qinghai	Qing chun 5	Abbondanza/Orofen
311	313	27918	Qinghai	Xiang nong 3	Mentana/Funo
312	314	27919	Qinghai	Gao yuan 506	Mentana/Xiaoe 186/4/Mentana/3/Triticum compactum/Elytrigia elongata//Xiaoe 599
313	315	28007	Qinghai	Qing chun 25	Qingchun 3/Mentana//Qinghai 2/Abbondanza
314	319	27966	Tibet	Zang dong 2	Fulanni/Heie Hvede
315	320	27967	Tibet	Zang chun 6	Mentana/Heie Hvede
317	322	27920	Sinkiang	Tuo ke xun 1	Bo2115/Hongxingchunxiaomai
319	324	27922	Sinkiang	Xin dong 7	Reyimuxia/Heine Hvede//Odessa 3
320	325	27923	Sinkiang	Yi nong 2	Ukraine 84/Xibei 612
321	326	27924	Sinkiang	Hong xuan 501	Selective from Xindong 2
322	327	28009	Sinkiang	A chun 1	Yili 1/Marquis
323	328	28010	Sinkiang	A chun 2	Achun 1/Saric F70
324	329	28011	Sinkiang	Xin chun 2	r-radiation of Cerros/Qichun 4
325	330	27718	BUR	IOMA50	Unknown
326	332	5309	IND	NP4	Unknown
327	333	6627	IND	SONALIKA	Unknown
328	334	27726	IND	Np797	Unknown
329	335	27731	IND	Pusa IP111	Unknown
330	336	27732	IND	Pusa IP112	Unknown
331	337	27740	IND	W.G.5	Unknown
332	339	27756	IND	NP880	Unknown
333	340	27689	JPN	Kui komugi	Unknown
334	342	27694	JPN	Norin 25	Unknown
335	343	27696	JPN	Norin 51	Unknown
336	344	27697	JPN	Norin 52	Unknown
337	345	27707	JPN	Yatomi komugi	Unknown
338	346	27712	JPN	Sin Na Ka Chou	Unknown
339	347	27750	JPN	Seto Komugi	Unknown
340	348	27751	JPN	SaKiGaKa mugi	Unknown
341	349	6529	KOR	SEU SEUN 27	Unknown
342	350	27684	KOR	Oksil 3	Unknown
343	351	27686	KOR	Chosun 69-1	Unknown
345	353	27708	KOR	Suwon 11	Unknown
346	354	27709	KOR	Suwon 86	Unknown
347	355	27713	KOR	Sunchulchong	Unknown
348	356	27748	KOR	Hae joo maek	Unknown
349	357	1313	NPL	BENCHUNG	Unknown
350	358	2141	NPL	CHIRKUNG	Unknown
351	359	2485	NPL	DHOJE	Unknown
352	360	3437	NPL	GUDEL	Unknown
353	361	3645	NPL	HONGGAOAN	Unknown
354	362	3965	NPL	JUBING	Unknown
355	363	5108	NPL	NACHIPUNDO	Unknown
356	364	5167	NPL	NEPAL 89	Unknown
357	365	6198	NPL	RITAK	Unknown
358	366	27720	KSM	Kashmir2	Unknown
359	367	27721	KSM	Kashmir3	Unknown
360	368	1217	PAK	BARANI 70	Unknown
361	369	3410	PAK	GREEN VALLEY	Unknown
362	370	3856	PAK	INDUS 66	Unknown
363	371	4739	PAK	Mexipak 65	Unknown
364	372	5579	PAK	PAK 70	Unknown
365	373	8572	PAK	AARI 83	Unknown
366	374	23981	PAK	SOOR GHANUM	Unknown
367	375	27715	PAK	C518	Unknown
368	376	27724	PAK	MEXIPAK 66	Unknown
CK1			Jiangsu	Sumai 3	Funo/Taiwan wheat
CK2			Jiangsu	Ningmai 11	Selective from variant plant of Ningmai 8
CK3			Jiangsu	Wangshuibai	Landrace
CK4			Sichuan	Mianyang 11	Chunanong 70-5858/Fan 6
